# Supplementary material
Source: PubMed Central journal article supplement (PMC4413768)
Supplement: ASN.2014050444_ASN2014050444SupplementaryData.pdf [file ASN.2014050444_ASN2014050444SupplementaryData.pdf]

Supplementary Table 1. Primer sequences used in PCR and Sequencing Experiments

| Name                            | Primer                            | Notes                             |
|---------------------------------|-----------------------------------|-----------------------------------|
| APOL1_G3-1 Forward              | 5'-GGG AGA TTC TTG CTG AGC TG-3'  | Fragment size: 1332bp             |
| APOL1_G3-1 Reverse <sup>1</sup> | 3'-GGA CCT TCT GAA CCC CAT CT-5'  | Annealing temp: 62 <sup>0</sup> C |
| APOL1_G3-2 Forward <sup>2</sup> | 5'-TGT CTG GCT CTC TCA GCA TT-3'  | Fragment size: 1058bp             |
| APOL1_G3-2 Reverse              | 3'-TCA CCC TCT TTA TCC CCC TAA-5' | Annealing temp: 58 <sup>0</sup> C |

<sup>1</sup>Sequencing primer used to avoid poly-T read from Chr22:36660857-36660876 (hg19); <sup>2</sup>Sequencing primer used to avoid poly-T read from Chr22:36662142-36662153 (hg19)
